# Supplementary material for: Genome Characteristics of the Endophytic Fungus Talaromyces sp. DC2 Isolated from Catharanthus roseus (L.) G. Don
Source: MDPI journal article supplement (doi:10.3390/jof10050352), 2024-05-15
Supplement: s1 [file s1]

**Supplementary Table S1. Comparison analysis of genome features of strain DC2 and 75 available *Talaromyces* strain in NCBI**

| No | Scientific name                        | Strains        | Genome size       | Assembly level | Data resource     |
|----|----------------------------------------|----------------|-------------------|----------------|-------------------|
| 1  | <i>Talaromyces piceae</i>              | 9-3            | 26,564,319        | Scaffold       | GCA_001657655.1   |
| 2  | <i>Talaromyces borbonicus</i>          | SV-2017a       | 27,050,413        | Scaffold       | GCA_002916415.1   |
| 3  | <i>Talaromyces marneffe</i>            | WCHTM105701    | 27,182,151        | Contig         | GCA_006111635.1   |
| 4  | <i>Talaromyces marneffe</i>            | PUMCH_TM1901   | 27,617,670        | Scaffold       | GCA_011320185.1   |
| 5  | <i>Talaromyces</i> sp. P2101           | PF2101         | 27,704,390        | Scaffold       | GCA_023626015.1   |
| 6  | <i>Talaromyces funiculosus</i>         | PF3603         | 27,934,616        | Scaffold       | GCA_023623875.1   |
| 7  | <i>Talaromyces funiculosus</i>         | D2P3           | 28,135,311        | Scaffold       | GCA_023623855.1   |
| 8  | <i>Talaromyces marneffe</i>            | 11CN-20-091    | 28,198,338        | Complete       | GCF_009556855.1   |
| 9  | <i>Talaromyces marneffe</i>            | 11CN-03-130    | 28,216,733        | Chromosome     | GCA_009650675.1   |
| 10 | <i>Talaromyces marneffe</i>            | TM4            | 28,307,147        | Complete       | GCA_003971505.1   |
| 11 | <i>Talaromyces marneffe</i>            | GZ8H79         | 28,376,234        | Contig         | GCA_013122295.1   |
| 12 | <i>Talaromyces funiculosus</i>         | R1404          | 28,385,195        | Scaffold       | GCA_023623975.1   |
| 13 | <i>Talaromyces funiculosus</i>         | X33            | 28,488,493        | Complete       | GCA_004299765.1   |
| 14 | <i>Talaromyces funiculosus</i>         | PK3801         | 28,528,190        | Scaffold       | GCA_023624025.1   |
| 15 | <i>Talaromyces marneffe</i> ATCC 18224 | ATCC 18224     | 28,643,865        | Scaffold       | GCF_000001985.1   |
| 16 | <i>Talaromyces funiculosus</i>         | D2B1           | 28,724,527        | Scaffold       | GCA_025768105.1   |
| 17 | <i>Talaromyces funiculosus</i>         | R1212          | 28,858,126        | Scaffold       | GCA_023623845.1   |
| 18 | <i>Talaromyces</i> sp. PT2101          | PF3502         | 28,879,243        | Scaffold       | GCA_023626035.1   |
| 19 | <i>Talaromyces marneffe</i> PM1        | PM1            | 28,887,485        | Contig         | GCA_000227055.2   |
| 20 | <i>Talaromyces marneffe</i> PM1        | PM1            | 29,022,615        | Contig         | GCA_000750115.2   |
| 21 | <i>Talaromyces funiculosus</i>         | D1B1           | 29,039,825        | Scaffold       | GCA_023623995.1   |
| 22 | <i>Talaromyces purpureogenus</i>       | Q2             | 29,077,759        | Contig         | GCA_019022425.1   |
| 23 | <i>Talaromyces funiculosus</i>         | RG13M1         | 29,154,027        | Scaffold       | GCA_023623825.1   |
| 24 | <i>Talaromyces</i> sp. PYS2103         | P2101          | 29,277,153        | Scaffold       | GCA_023625975.1   |
| 25 | <i>Talaromyces</i> sp. PH2104          | PT2101         | 29,383,702        | Scaffold       | GCA_023625955.1   |
| 26 | <i>Talaromyces</i> sp. F3606           | PYS2103        | 29,457,564        | Scaffold       | GCA_023625895.1   |
| 27 | <i>Talaromyces funiculosus</i>         | R2203A         | 29,504,766        | Scaffold       | GCA_023623985.1   |
| 28 | <i>Talaromyces ruber</i>               | FKI-L3-BK-DAB3 | 30,034,193        | Scaffold       | GCA_022813215.1   |
| 29 | <i>Talaromyces atroseus</i>            | IBT 11181      | 30,858,562        | Scaffold       | GCF_001907595.1   |
| 30 | <i>Talaromyces thailandensis</i>       | OC-R06-P5      | 31,813,847        | Scaffold       | GCA_019828575.1   |
| 31 | <i>Talaromyces trachyspermus</i>       | 4014           | 32,038,095        | Contig         | GCA_020137715.1   |
| 32 | <i>Talaromyces</i> sp. PL2406          | B14P1          | 32,900,204        | Scaffold       | GCA_023626215.1   |
| 33 | <i>Talaromyces</i> sp. PT3601          | M1327          | 33,633,690        | Scaffold       | GCA_023626395.1   |
| 34 | <i>Talaromyces</i> sp. R2412           | PX1902         | 33,681,611        | Scaffold       | GCA_023626135.1   |
| 35 | <i>Talaromyces amestolkiae</i>         | CIB            | 33,721,883        | Scaffold       | GCF_001896365.1   |
| 36 | <i>Talaromyces amestolkiae</i>         | X1601          | 33,824,912        | Scaffold       | GCA_023623795.1   |
| 37 | <i>Talaromyces</i> sp. PF2101          | X2403          | 33,878,408        | Scaffold       | GCA_023626055.1   |
| 38 | <i>Talaromyces amestolkiae</i>         | G173           | 33,972,799        | Contig         | GCA_027569865.1   |
| 39 | <i>Talaromyces</i> sp. R2405           | R2412          | 34,240,689        | Scaffold       | GCA_023626155.1   |
| 40 | <i>Talaromyces</i> sp. PX2406          | PL2406         | 34,271,254        | Scaffold       | GCA_023626115.1   |
| 41 | <i>Talaromyces</i> sp. B14P1           | PYS2902        | 34,461,311        | Scaffold       | GCA_023626195.1   |
| 42 | <i>Talaromyces stoll</i>               | CLY-6          | 34,462,933        | Scaffold       | GCA_014065225.1   |
| 43 | <b><i>Talaromyces radicus</i></b>      | <b>DC2</b>     | <b>34,575,287</b> | <b>Contig</b>  | <b>This study</b> |
| 44 | <i>Talaromyces</i> sp. PX2802          | PF30-10        | 34,594,379        | Scaffold       | GCA_023626255.1   |

|    |                                          |                  |            |          |                 |
|----|------------------------------------------|------------------|------------|----------|-----------------|
| 45 | <i>Talaromyces</i> sp. PF3502            | PM2405           | 34,671,233 | Scaffold | GCA_023625995.1 |
| 46 | <i>Talaromyces</i> sp. PF30-1C           | PF30-5           | 34,714,567 | Scaffold | GCA_023626275.1 |
| 47 | <i>Talaromyces islandicus</i>            | WF-38-12         | 34,715,840 | Scaffold | GCA_000985935.1 |
| 48 | <i>Talaromyces</i> sp. PF30-10           | PF30-1C          | 34,746,589 | Scaffold | GCA_023626295.1 |
| 49 | <i>Talaromyces</i> sp. PG4302            | PT3601           | 34,770,149 | Scaffold | GCA_023626335.1 |
| 50 | <i>Talaromyces pinophilus</i>            | PSF-12(1)        | 34,770,673 | Contig   | GCA_003316675.1 |
| 51 | <i>Talaromyces</i> sp. PYS2902           | PF30-1D          | 34,806,200 | Scaffold | GCA_023626235.1 |
| 52 | <i>Talaromyces</i> sp. PF30-1D           | PG4302           | 34,879,448 | Scaffold | GCA_023626315.1 |
| 53 | <i>Talaromyces</i> sp. PX1902            | PX2802           | 35,032,352 | Scaffold | GCA_023626175.1 |
| 54 | <i>Talaromyces</i> sp. X2403             | PX2406           | 35,045,590 | Scaffold | GCA_023626095.1 |
| 55 | <i>Talaromyces</i> sp. PM2405            | R2405            | 35,331,725 | Scaffold | GCA_023626075.1 |
| 56 | <i>Talaromyces</i> sp. PF30-5            | S1602            | 35,401,712 | Scaffold | GCA_023626375.1 |
| 57 | <i>Talaromyces liani</i>                 | FKII-L2-CM-P1    | 35,494,196 | Scaffold | GCA_022814625.1 |
| 58 | <i>Talaromyces liani</i>                 | FKII-L2-CM-DRAB3 | 35,499,968 | Scaffold | GCA_022814505.1 |
| 59 | <i>Talaromyces stipitatus</i> ATCC 10500 | ATCC 10500       | 35,685,443 | Scaffold | GCF_000003125.1 |
| 60 | <i>Talaromyces rugulosus</i>             | W13939           | 35,758,560 | Complete | GCF_013368755.1 |
| 61 | <i>Talaromyces adpressus</i>             | CBS 142503       | 36,107,696 | Scaffold | GCA_002775195.1 |
| 62 | <i>Talaromyces pinophilus</i>            | AR155            | 36,366,659 | Scaffold | GCA_011392495.1 |
| 63 | <i>Talaromyces pinophilus</i>            | Y-94             | 36,402,801 | Scaffold | GCA_000829775.1 |
| 64 | <i>Talaromyces pinophilus</i>            | 1-95             | 36,480,443 | Complete | GCA_001571465.2 |
| 65 | <i>Talaromyces pinophilus</i>            | J7Y3             | 36,811,154 | Scaffold | GCA_023623735.1 |
| 66 | <i>Talaromyces pinophilus</i>            | M8004A           | 37,375,402 | Scaffold | GCA_023623785.1 |
| 67 | <i>Talaromyces pinophilus</i>            | P8041            | 37,439,112 | Scaffold | GCA_023623755.1 |
| 68 | <i>Talaromyces pinophilus</i>            | NRRL 3647        | 37,575,941 | Contig   | GCA_027569565.1 |
| 69 | <i>Talaromyces pinophilus</i>            | NRRL 3503        | 37,579,131 | Contig   | GCA_027569545.1 |
| 70 | <i>Talaromyces proteolyticus</i>         | PMI_201          | 37,611,490 | Contig   | GCF_021365285.1 |
| 71 | <i>Talaromyces verruculosus</i>          | TS63-9           | 37,629,238 | Scaffold | GCA_001305275.1 |
| 72 | <i>Talaromyces albobiverticillius</i>    | Tp-2             | 38,354,882 | Contig   | GCA_023721895.2 |
| 73 | <i>Talaromyces pinophilus</i>            | NA01             | 38,535,829 | Contig   | GCA_009805475.2 |
| 74 | <i>Talaromyces wortmannii</i>            | LMB-HP14         | 38,588,669 | Scaffold | GCA_001939245.1 |
| 75 | <i>Talaromyces purpureogenus</i>         | MYA-38           | 38,853,631 | Scaffold | GCA_001270325.1 |
| 76 | <i>Talaromyces nanjingensis</i>          | JP-NJ4           | 42,526,372 | Contig   | GCA_031010415.1 |
